# Supplementary material for: Investigation of the influence of alkyl side chain length on the fluorescence response of C153 in a series of room temperature ionic liquids
Source: Royal Society of Chemistry journal article supplement (doi:10.1039/c4ra16864j), 2015-01-01
Supplement: c4ra16864j1.pdf [file c4ra16864j1.pdf]

*Supplementary information for*

**Investigation of the influence of alkyl side chain length on the fluorescence response of C153 in a series of room temperature ionic liquids**

Sudhir Kumar Das, Debashis Majhi, Prabhat Kumar Sahu and Moloy Sarkar \*

School of Chemical Sciences,  
National Institute of Science Education and Research, Bhubaneswar 751005, India

---

\*To whom correspondence should be addressed. Email: [moloysarkar@gmail.com](mailto:moloysarkar@gmail.com). Phone: +91-674-2304037 Fax: +91-674-2302436.

**Table S1** Experimental dynamic viscosity ( $\eta$ ) for  $[C_n\text{mim}][\text{FAP}]$  ( $n=2, 4, 6$ ), room temperature ionic liquids at different temperatures.

---

$\eta/\text{cP}^a$

| Temp. (K) | [C <sub>2</sub> mim][FAP] | [C <sub>4</sub> mim][FAP] | [C <sub>6</sub> mim][FAP] |
|-----------|---------------------------|---------------------------|---------------------------|
| 293       | 73.1                      | 93.4                      | 112.7                     |
| 298       | 58.5                      | 72.3                      | 86.7                      |
| 303       | 47.6                      | 57.4                      | 67.9                      |
| 308       | 39.2                      | 46.3                      | 54.1                      |
| 313       | 32.5                      | 37.8                      | 43.2                      |
| 318       | 27.1                      | 31.1                      | 35.2                      |
| 323       | 22.9                      | 25.7                      | 28.8                      |

experimental errors are  $\pm 5\%$

**Table S2** Experimental density of [C<sub>n</sub>mim][FAP] (n=2, 4, 6), room temperature ionic liquids at different temperatures.

| Temp. (K) | $\rho/\text{gm cm}^{-3}$  |                           |                           |
|-----------|---------------------------|---------------------------|---------------------------|
|           | [C <sub>2</sub> mim][FAP] | [C <sub>4</sub> mim][FAP] | [C <sub>6</sub> mim][FAP] |
| 293       | 1.714621                  | 1.630374                  | 1.555163                  |
| 298       | 1.708707                  | 1.624752                  | 1.549773                  |
| 303       | 1.702773                  | 1.619121                  | 1.544367                  |
| 308       | 1.696854                  | 1.613498                  | 1.538969                  |
| 313       | 1.690951                  | 1.607885                  | 1.533583                  |
| 318       | 1.685064                  | 1.602278                  | 1.528208                  |
| 323       | 1.679198                  | 1.596683                  | 1.522850                  |

experimental errors are  $\pm 5\%$

**Table S3** Fitting Parameters for Viscosity Measurements

| RTILs                     | A <sub>0</sub> | A <sub>1</sub> | R <sup>2</sup> |
|---------------------------|----------------|----------------|----------------|
| [C <sub>2</sub> mim][FAP] | -3.55          | 1583.93        | 0.9992         |
| [C <sub>4</sub> mim][FAP] | -4.02          | 1752.10        | 0.9988         |
| [C <sub>6</sub> mim][FAP] | -4.31          | 1861.30        | 0.9992         |

**Table S4** Fitting Parameters for Densities Measurements

| RTILs                     | A <sub>2</sub> | A <sub>3</sub> × 10 <sup>-3</sup> | R <sup>2</sup> |
|---------------------------|----------------|-----------------------------------|----------------|
| [C <sub>2</sub> mim][FAP] | 2.06           | -1.18                             | 0.9999         |
| [C <sub>4</sub> mim][FAP] | 1.96           | -1.12                             | 1.0000         |
| [C <sub>6</sub> mim][FAP] | 1.87           | -1.08                             | 0.9999         |

**Table S5** Reorientation Times of C153 in [C<sub>n</sub>mim][FAP] (n=2, 4, and 6) room temperature ionic liquids as a Function of Temperature

| RTILs                     | Temp.(K) | Vis.(cP) | $^a r_0$ | $a_1$ | $\tau_{1r}$ | $a_2$ | $\tau_{2r}$ | $\langle \tau_r(\text{ns}) \rangle$ | $^b C_{\text{obs}}$ |
|---------------------------|----------|----------|----------|-------|-------------|-------|-------------|-------------------------------------|---------------------|
| [C <sub>2</sub> mim][FAP] | 293      | 73.1     | 0.38     | 0.22  | 0.94        | 0.78  | 4.12        | 3.42                                | 0.52                |
|                           | 298      | 58.5     | 0.38     | 0.20  | 0.92        | 0.80  | 3.11        | 2.67                                | 0.51                |
|                           | 303      | 47.6     | 0.37     | 0.23  | 0.89        | 0.77  | 2.58        | 2.19                                | 0.53                |
|                           | 308      | 39.2     | 0.37     | 0.33  | 0.98        | 0.67  | 2.31        | 1.87                                | 0.56                |
|                           | 313      | 32.5     | 0.38     | 0.70  | 1.18        | 0.30  | 2.57        | 1.60                                | 0.58                |
| [C <sub>4</sub> mim][FAP] | 293      | 93.4     | 0.37     | 0.20  | 1.00        | 0.80  | 5.58        | 4.66                                | 0.55                |
|                           | 298      | 72.3     | 0.36     | 0.20  | 0.80        | 0.80  | 4.35        | 3.64                                | 0.57                |
|                           | 303      | 57.4     | 0.37     | 0.21  | 0.65        | 0.79  | 3.49        | 2.89                                | 0.58                |
|                           | 308      | 46.3     | 0.37     | 0.21  | 0.53        | 0.79  | 2.82        | 2.34                                | 0.59                |
|                           | 313      | 37.8     | 0.36     | 0.21  | 0.57        | 0.79  | 2.39        | 2.01                                | 0.63                |
| [C <sub>6</sub> mim][FAP] | 293      | 112.7    | 0.37     | 0.23  | 0.81        | 0.77  | 6.37        | 5.17                                | 0.51                |
|                           | 298      | 86.7     | 0.36     | 0.24  | 1.01        | 0.76  | 5.14        | 4.15                                | 0.54                |
|                           | 303      | 67.9     | 0.37     | 0.23  | 0.81        | 0.77  | 3.98        | 3.25                                | 0.55                |
|                           | 308      | 54.1     | 0.36     | 0.21  | 0.66        | 0.79  | 3.16        | 2.63                                | 0.57                |
|                           | 313      | 43.2     | 0.35     | 0.19  | 0.63        | 0.81  | 2.53        | 2.17                                | 0.59                |

<sup>a</sup> initial anisotropy, <sup>b</sup> observed rotational coupling constant

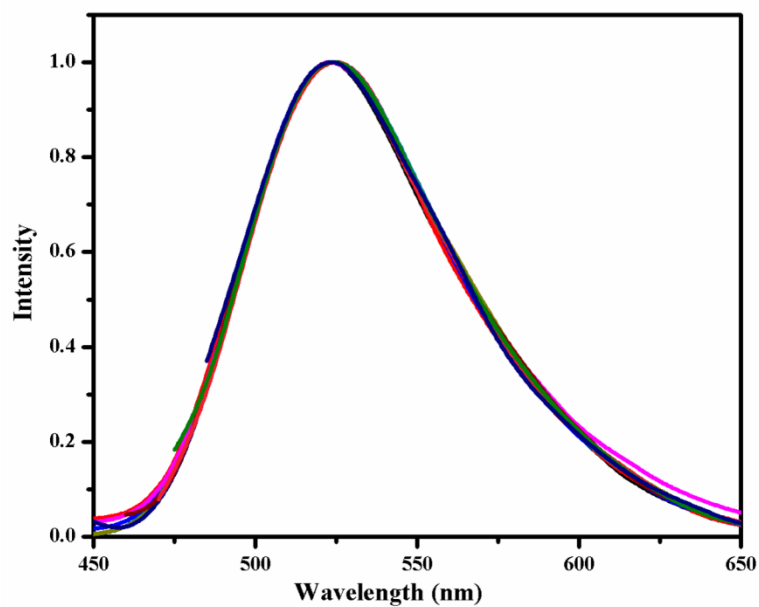

**Fig. S1** Normalized excitation wavelength dependent emission spectra of C153 in [C<sub>2</sub>mim][FAP] ionic liquid.

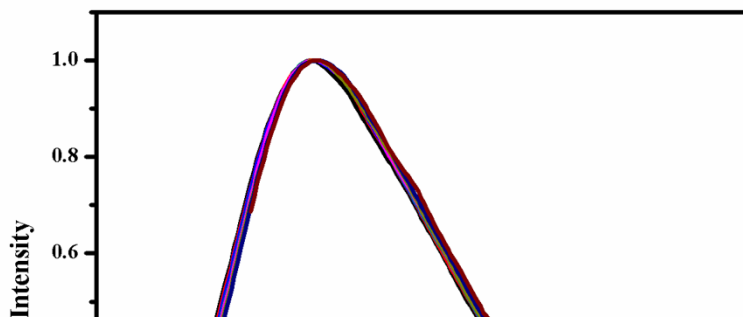

**Fig. S2** Normalized excitation wavelength dependent emission spectra of C153 in [C<sub>6</sub>mim][FAP] ionic liquid.
